# Supplementary material for: Extending the Aerolysin Family: From Bacteria to Vertebrates
Source: PLoS One. 2011 Jun 8;6(6):e20349. doi: 10.1371/journal.pone.0020349 (PMC3110756; doi:10.1371/journal.pone.0020349)
Supplement: Table S1 — List of proteins identified as members of the aerolysin superfamily containing Uniprot ID, protein name and species. (XLS) [file pone.0020349.s001.xls]

## Sheet: Sheet1
Uniprot ID	Protein name	species name
D7U3I0	Whole genome shotgun sequence of line PN40024, scaffold_5.assembly12x (Fragment)	Vitis vinifera
Q7Z8V1	Hemolytic lectin LSLa	Laetiporus sulphureus
A6SQT9	Predicted protein	Botryotinia fuckeliana (strain B05.10)
Q17410	Protein B0001.1a, confirmed by transcript evidence	Caenorhabditis elegans
D8PWK7	Putative uncharacterized protein	Schizophyllum commune (strain H4-8 / FGSC 9210)
A9V0V5	Predicted protein	Monosiga brevicollis
Q0ZST2	27 kDa salivary protein SP20	Phlebotomus argentipes
Q8VRH4	Aerolysin-like toxin (Fragment)	Aeromonas hydrophila
Q8VVB3	Aerolysin-like toxin (Fragment)	Aeromonas veronii
C5VS17	Putative uncharacterized protein	Clostridium botulinum D str. 1873
Q45728	Parasporal crystal protein C53	Bacillus thuringiensis
A7SQM5	Predicted protein	Nematostella vectensis
B1PNB5	Alpha-toxin	Clostridium septicum
B1HN08	Putative uncharacterized protein	Lysinibacillus sphaericus (strain C3-41)
B7PQ22	Putative uncharacterized protein	Ixodes scapularis
B6E6R6	Pore-forming cytolysin (Fragment)	Clostridium septicum
C3L4V8	Putative uncharacterized protein	Bacillus anthracis (strain CDC 684 / NRRL 3495)
A3US09	Putative uncharacterized protein	Vibrio splendidus 12B01
A9VAX8	Predicted protein	Monosiga brevicollis
B7PF31	Salivary secreted cytotoxin, putative (Fragment)	Ixodes scapularis
C3FB42	Putative uncharacterized protein	Bacillus thuringiensis serovar monterrey BGSC 4AJ1
A6FHW7	Putative uncharacterized protein	Moritella sp. PE36
B7QJ58	Putative uncharacterized protein	Ixodes scapularis
A9JRD1	Zgc:172143 protein	Danio rerio
Q8GLI3	Aerolysin (Fragment)	Aeromonas hydrophila
Q8RN79	Aerolysin (Fragment)	Aeromonas hydrophila
B9P7I5	Predicted protein (Fragment)	Populus trichocarpa
E4ZP30	Similar to DUF946 domain-containing protein	Leptosphaeria maculans
A7RL11	Predicted protein	Nematostella vectensis
Q45422	Mosquitocidal toxin	Bacillus sphaericus
Q8GN63	Hemolysin	Aeromonas hydrophila
C3CBM9	Putative uncharacterized protein	Bacillus thuringiensis serovar tochigiensis BGSC 4Y1
B7PSG2	Secreted salivary gland peptide, putative (Fragment)	Ixodes scapularis
Q6LFZ2	Putative uncharacterized protein	Photobacterium profundum
B1HMI9	35.8-kilodalton mosquitocidal toxin	Lysinibacillus sphaericus (strain C3-41)
D3B7S3	Putative uncharacterized protein	Polysphondylium pallidum
B9NAC8	Predicted protein	Populus trichocarpa
A8XWL7	CBR-LNTL-1 protein	Caenorhabditis briggsae
Q8RJH3	Aerolysin (Fragment)	Aeromonas hydrophila
Q9S5D4	Hemolysin	Aeromonas hydrophila
E7F8T3	Uncharacterized protein	Danio rerio
Q2P9W4	Pre-provibrioaerolysin	Vibrio splendidus
D8Q4K2	Putative uncharacterized protein	Schizophyllum commune (strain H4-8 / FGSC 9210)
D0NMV9	Hybrid signal transduction histidine kinase, putative	Phytophthora infestans T30-4
B9NAC5	Predicted protein	Populus trichocarpa
D8SIW4	Putative uncharacterized protein	Selaginella moellendorffii
D7IJX3	Putative uncharacterized protein	Bacteroides sp. 1_1_14
Q7ZA61	Zb protein	Coprinus comatus
A5AYS3	Putative uncharacterized protein	Vitis vinifera
Q5YL01	Hemolysin	Aeromonas hydrophila
D5LM16	Epsilon toxin (Fragment)	Clostridium perfringens D
Q7Z8V0	Hemolytic lectin LSLb	Laetiporus sulphureus
Q3F160	Pesticidial crystal protein cry15Aa	Bacillus thuringiensis serovar israelensis ATCC 35646
B1PNB0	Alpha-toxin	Clostridium septicum
Q8VRH3	Aerolysin-like toxin (Fragment)	Aeromonas sobria
C9NME1	Putative uncharacterized protein	Vibrio coralliilyticus ATCC BAA-450
D8PUM1	Putative uncharacterized protein	Schizophyllum commune (strain H4-8 / FGSC 9210)
D8RY25	Putative uncharacterized protein	Selaginella moellendorffii
C7FNH6	Cry	Bacillus thuringiensis subsp. jegathesan
B1WBF1	LOC100145764 protein (Fragment)	Xenopus tropicalis
B1PNB4	Alpha-toxin	Clostridium septicum
E5VKM5	Putative uncharacterized protein	Lachnospiraceae bacterium 5_1_63FAA
D8PLD7	Putative uncharacterized protein	Schizophyllum commune (strain H4-8 / FGSC 9210)
Q3F161	Pesticidial crystal protein cry15Aa	Bacillus thuringiensis serovar israelensis ATCC 35646
Q9KX33	SrpA	Streptococcus cristatus
A8P0I3	Putative uncharacterized protein	Coprinopsis cinerea (strain Okayama-7 / 130 / FGSC 9003)
A7SVJ8	Predicted protein	Nematostella vectensis
E5QCG5	Protein B0001.1b, confirmed by transcript evidence	Caenorhabditis elegans
D4QGQ7	Crystal protein	Bacillus thuringiensis
Q8VRH6	Aerolysin-like toxin (Fragment)	Aeromonas hydrophila
E2LU90	Putative uncharacterized protein	Moniliophthora perniciosa FA553
Q93FF2	Crystal protein NT40KD	Bacillus thuringiensis subsp. dakota
A9VCT2	Predicted protein	Monosiga brevicollis
Q2MLU7	Hemolysin	Aeromonas hydrophila
C6DXY7	Alpha-toxin	Clostridium botulinum D str. 1873
Q7ZA64	Zb protein	Hericium erinaceum
Q9RM68	Epsilon toxin (Fragment)	Clostridium perfringens D
D8RP42	Putative uncharacterized protein	Selaginella moellendorffii
Q6L5X8	Parasporin 1470D	Bacillus thuringiensis serovar shandongiensis
B8P5Q3	Predicted protein	Postia placenta (strain ATCC 44394 / Madison 698-R)
B3G4H0	Natterin-like protein	Adineta vaga
D5L847	Crystal protein	Bacillus thuringiensis serovar malayensis
B3JDN5	Putative uncharacterized protein	Bacillus anthracis Tsiankovskii-I
D0I1N4	Putative outer membrane adhesin like protein	Vibrio cholerae CT 5369-93
Q57539	35.8-kilodalton mosquitocidal toxin	Bacillus sphaericus
Q7ZA60	Zb protein	Ganoderma lucidum
A7RL10	Predicted protein	Nematostella vectensis
B5GTM4	Putative uncharacterized protein	Streptomyces clavuligerus ATCC 27064
E4Z1E7	Whole genome shotgun assembly, allelic scaffold set, scaffold scaffoldA_2209 (Fragment)	Oikopleura dioica
C3FBL0	Putative uncharacterized protein	Bacillus thuringiensis serovar monterrey BGSC 4AJ1
A8WG86	Zgc:172260 protein	Danio rerio
Q53482	Alpha-toxin	Clostridium septicum
A6N845	Hemolysin	Aeromonas sobria
E4NUP8	Putative uncharacterized protein	Halogeometricum borinquense (strain ATCC 700274 / DSM 11551 / JCM 10706 / PR3)
D1WYU1	Putative uncharacterized protein	Streptomyces sp. ACT-1
B1GRJ5	Putative uncharacterized protein	Bacillus anthracis str. A0465
Q8RN80	Aerolysin (Fragment)	Aeromonas hydrophila
A9LRU4	Aerolysin (Fragment)	Aeromonas hydrophila
A3CM52	Platelet-binding glycoprotein	Streptococcus sanguinis (strain SK36)
B7PGQ3	Secreted salivary gland peptide, putative (Fragment)	Ixodes scapularis
Q45470	Mtx2	Bacillus sphaericus
D8QP12	Putative uncharacterized protein	Selaginella moellendorffii
A9QTG4	Aeromonas virulence factor	uncultured microorganism
B3DK25	Zgc:194686 protein	Danio rerio
Q0ZST0	30 kDa salivary protein SP56	Phlebotomus argentipes
D8PLH1	Putative uncharacterized protein (Fragment)	Schizophyllum commune (strain H4-8 / FGSC 9210)
A8E5N2	Zgc:174688 protein	Danio rerio
D8Q5Q9	Expressed protein	Schizophyllum commune (strain H4-8 / FGSC 9210)
B1BAB6	Putative uncharacterized protein	Clostridium botulinum C str. Eklund
A9V9K2	Predicted protein	Monosiga brevicollis
A9KWE4	Aerolysin/hemolysin/leukocidin toxin	Shewanella baltica (strain OS195)
E2Q428	DUF946 domain-containing protein	Streptomyces clavuligerus ATCC 27064
A9LRU6	Aerolysin (Fragment)	Aeromonas hydrophila
A8X0K5	CBR-LIN-24 protein	Caenorhabditis briggsae
Q2SGB9	Putative uncharacterized protein	Hahella chejuensis (strain KCTC 2396)
Q8RN78	Aerolysin (Fragment)	Aeromonas hydrophila
Q8RN86	Aerolysin (Fragment)	Aeromonas hydrophila
B1PNB3	Alpha-toxin	Clostridium septicum
D5SJJ8	Putative uncharacterized protein	Streptomyces clavuligerus ATCC 27064
A9ULW8	LOC100137633 protein	Xenopus laevis
E5S7T9	Putative uncharacterized protein	Trichinella spiralis
A5L2G4	Putative uncharacterized protein	Vibrionales bacterium SWAT-3
A4CNA4	Putative uncharacterized protein	Robiginitalea biformata (strain ATCC BAA-864 / HTCC2501 / KCTC 12146)
Q0ZST4	29 kDa salivary protein SP17	Phlebotomus argentipes
B1V315	Epsilon-toxin	Clostridium perfringens D str. JGS1721
E3BQM3	Putative uncharacterized protein	Vibrio caribbenthicus ATCC BAA-2122
Q57028	35.8-kilodalton mosquitocidal toxin	Bacillus sphaericus
D8Q5Q4	Putative uncharacterized protein	Schizophyllum commune (strain H4-8 / FGSC 9210)
A6WLL7	Aerolysin/hemolysin/leukocidin toxin	Shewanella baltica (strain OS185)
B9NAC6	Predicted protein	Populus trichocarpa
C3BFN1	Putative uncharacterized protein	Bacillus pseudomycoides DSM 12442
Q9KKG8	Crystal protein	Bacillus thuringiensis
A8P3Y5	Putative uncharacterized protein (Fragment)	Brugia malayi
Q93LP6	Crystal protein ET84	Bacillus thuringiensis
Q8VRH1	Aerolysin-like toxin (Fragment)	Aeromonas sobria
O85370	Preproaerolysin	Aeromonas trota
Q3ZVK9	Putative transmembrane protein	Spiroplasma citri
Q8RN87	Aerolysin (Fragment)	Aeromonas hydrophila
C3FUF6	Putative uncharacterized protein	Bacillus thuringiensis serovar berliner ATCC 10792
D2F011	Putative uncharacterized protein	Bacteroides sp. D20
D8RD86	Putative uncharacterized protein	Selaginella moellendorffii
B4JGP7	GH18885	Drosophila grimshawi
Q8RN88	Aerolysin (Fragment)	Aeromonas hydrophila
B1PNB6	Alpha-toxin	Clostridium septicum
A4SSI7	Aerolysin	Aeromonas salmonicida (strain A449)
B7PLZ7	Secreted salivary gland peptide, putative (Fragment)	Ixodes scapularis
E3TBY7	Natterin-like protein	Ictalurus furcatus
D8SJ10	Putative uncharacterized protein	Selaginella moellendorffii
C6DXX7	Putative epsilon-toxin type B	Clostridium botulinum D str. 1873
Q57398	Epsilaon-toxin	Clostridium perfringens
B9SC09	Putative uncharacterized protein	Ricinus communis
B4FHK4	Putative uncharacterized protein	Zea mays
A8UMA9	Putative uncharacterized protein	Flavobacteriales bacterium ALC-1
P94128	Hemolysin	Aeromonas punctata
B0D3D1	Predicted protein	Laccaria bicolor (strain S238N-H82)
Q18341	Lin-24 (Twenty-four) like protein 1, isoform a, confirmed by transcript evidence	Caenorhabditis elegans
Q45471	35.8-kilodalton mosquitocidal toxin	Bacillus sphaericus
Q8RN81	Aerolysin (Fragment)	Aeromonas hydrophila
E0ILM0	Aerolysin/hemolysin/leukocidin toxin	Shewanella baltica BA175
C5LZS9	Putative uncharacterized protein	Perkinsus marinus ATCC 50983
C3IAI7	Putative uncharacterized protein	Bacillus thuringiensis IBL 200
E3MSY0	CRE-LIN-24 protein	Caenorhabditis remanei
A8M593	Putative uncharacterized protein	Salinispora arenicola (strain CNS-205)
D5SKT1	Putative uncharacterized protein	Streptomyces clavuligerus ATCC 27064
E3MJV9	CRE-LNTL-1 protein	Caenorhabditis remanei
A2IBP2	Hemolysin (Fragment)	Aeromonas hydrophila
Q45476	Mtx2	Bacillus sphaericus
C3ZKX5	Putative uncharacterized protein	Branchiostoma floridae
B2ZF41	Aerolysin	Aeromonas hydrophila
D8T6T3	Putative uncharacterized protein	Selaginella moellendorffii
B7P7X2	Putative uncharacterized protein	Ixodes scapularis
E3BQM2	Putative uncharacterized protein	Vibrio caribbenthicus ATCC BAA-2122
D4VNY8	Putative lipoprotein	Bacteroides xylanisolvens SD CC 1b
Q93CE6	Hemolysin	Aeromonas hydrophila
Q8VL68	Aerolysin-like toxin (Fragment)	Aeromonas hydrophila
D8QP10	Putative uncharacterized protein	Selaginella moellendorffii
A8LZ31	Putative uncharacterized protein	Salinispora arenicola (strain CNS-205)
A9LRU5	Aerolysin (Fragment)	Aeromonas hydrophila
Q6AW28	Crystal protein	Bacillus thuringiensis
B6HA84	Pc16g15420 protein	Penicillium chrysogenum (strain ATCC 28089 / DSM 1075 / Wisconsin 54-1255)
Q4JEV5	Pore-forming toxin-like protein Hfr-2	Triticum aestivum
D7U3H5	Whole genome shotgun sequence of line PN40024, scaffold_5.assembly12x (Fragment)	Vitis vinifera
A9V0Z1	Predicted protein	Monosiga brevicollis
A9V8L6	Predicted protein	Monosiga brevicollis
D9WV31	Putative uncharacterized protein	Streptomyces hygroscopicus ATCC 53653
B6STM7	Putative uncharacterized protein	Zea mays
Q8I7L5	Lin-24 (Twenty-four) like protein 1, isoform b, confirmed by transcript evidence	Caenorhabditis elegans
D8RSG8	Putative uncharacterized protein	Selaginella moellendorffii
D8PUA4	Putative uncharacterized protein	Schizophyllum commune (strain H4-8 / FGSC 9210)
D0KMC0	Putative uncharacterized protein	Pectobacterium wasabiae (strain WPP163)
B5GLW7	Putative uncharacterized protein	Streptomyces clavuligerus ATCC 27064
B9P737	Predicted protein	Populus trichocarpa
A8M3W2	Putative uncharacterized protein	Salinispora arenicola (strain CNS-205)
A7SFW2	Predicted protein	Nematostella vectensis
A5KXA7	Putative uncharacterized protein	Vibrionales bacterium SWAT-3
B0AZ97	Putative uncharacterized protein	Bacillus anthracis str. A0488
Q2L856	Sip1A	Bacillus thuringiensis
D8TCR4	Putative uncharacterized protein	Selaginella moellendorffii
B1HMB1	Putative uncharacterized protein	Lysinibacillus sphaericus (strain C3-41)
E3BJR0	Putative uncharacterized protein	Vibrio caribbenthicus ATCC BAA-2122
B6E6W5	Pore-forming cytolysin (Fragment)	Clostridium septicum
B9P627	Predicted protein (Fragment)	Populus trichocarpa
A2AXD9	Putative uncharacterized protein	Streptomyces cinnamonensis
Q7ZA62	Zb protein	Pleurotus eryngii var. ferulae
A8T2E8	Hemolysin	Vibrio sp. AND4
Q4PMT7	Putative salivary secreted cytotoxin (Fragment)	Ixodes scapularis
A6RV96	Predicted protein	Botryotinia fuckeliana (strain B05.10)
D7NNB4	Putative uncharacterized protein	Acropora millepora
B9S0N3	Putative uncharacterized protein	Ricinus communis
O42343	Ep37-A1	Cynops pyrrhogaster
A9LRU8	Aerolysin (Fragment)	Aeromonas hydrophila
C3HTD4	Putative uncharacterized protein	Bacillus thuringiensis serovar pulsiensis BGSC 4CC1
C7PB80	Putative uncharacterized protein	Chitinophaga pinensis (strain ATCC 43595 / DSM 2588 / NCIB 11800 / UQM 2034)
D8S875	Putative uncharacterized protein	Selaginella moellendorffii
E0HLR8	Aerolysin/hemolysin/leukocidin toxin	Shewanella baltica OS183
D8U3I7	Putative uncharacterized protein	Volvox carteri f. nagariensis
B0D5P1	Predicted protein	Laccaria bicolor (strain S238N-H82)
C3HBB5	35.8-kilodalton mosquitocidal toxin	Bacillus thuringiensis serovar huazhongensis BGSC 4BD1
A0Q1D4	Putative uncharacterized protein	Clostridium novyi (strain NT)
E5VE48	Putative uncharacterized protein	Bacteroides sp. 4_1_36
A2CAY9	Putative uncharacterized protein	Prochlorococcus marinus (strain MIT 9303)
E5SIX7	DNA excision repair protein ERCC-6	Trichinella spiralis
Q8RN82	Aerolysin (Fragment)	Aeromonas hydrophila
B1R956	Epsilon-toxin	Clostridium perfringens B str. ATCC 3626
B7QIW2	Secreted salivary gland peptide, putative	Ixodes scapularis
A9UPK2	Predicted protein	Monosiga brevicollis
B7SB32	Cry1518-45	Bacillus thuringiensis YBT-1518
A7MVX5	Putative uncharacterized protein	Vibrio harveyi (strain ATCC BAA-1116 / BB120)
C3GC23	Putative uncharacterized protein	Bacillus thuringiensis serovar andalousiensis BGSC 4AW1
Q8RN84	Aerolysin (Fragment)	Aeromonas hydrophila
C3IVB6	Pesticidial crystal protein cry15Aa	Bacillus thuringiensis IBL 4222
B7PYG8	Secreted salivary gland peptide, putative	Ixodes scapularis
B6VF02	Hemolysin	Aeromonas hydrophila
A8II82	Epsilon-toxin (Fragment)	Clostridium perfringens
A8LVM9	Putative uncharacterized protein	Salinispora arenicola (strain CNS-205)
A9V1T4	Predicted protein	Monosiga brevicollis
B7Q3Q8	Secreted salivary gland peptide, putative	Ixodes scapularis
A7IZR5	Cry51Aa1	Bacillus thuringiensis
A6AKR1	Pre-provibrioaerolysin	Vibrio harveyi HY01
A3UR86	Putative uncharacterized protein	Vibrio splendidus 12B01
Q8G8K0	Alpha-toxin	Clostridium septicum
E4UVD2	Putative uncharacterized protein	Arthroderma gypseum CBS 118893
B1PNB2	Alpha-toxin	Clostridium septicum
E4XRP7	Whole genome shotgun assembly, reference scaffold set, scaffold scaffold_108	Oikopleura dioica
Q8GI65	Alpha-toxin	Clostridium septicum
B7PBW7	Secreted salivary gland peptide, putative (Fragment)	Ixodes scapularis
C2W3V5	Putative uncharacterized protein	Bacillus cereus Rock3-44
D8QCK6	Expressed protein	Schizophyllum commune (strain H4-8 / FGSC 9210)
Q7Z8U9	Hemolytic lectin LSLc	Laetiporus sulphureus
D6X406	Putative uncharacterized protein	Tribolium castaneum
Q6IZF1	Beta-hemolysin	Aeromonas hydrophila
E4N465	Putative uncharacterized protein	Kitasatospora setae (strain ATCC 33774 / DSM 43861 / JCM 3304 / KCC A-0304 / NBRC 14216 / KM-6054)
D8SX47	Putative uncharacterized protein	Selaginella moellendorffii
Q6L9E7	Aerolysin (Fragment)	Aeromonas veronii bv. sobria
C0NLC6	Putative uncharacterized protein	Ajellomyces capsulata (strain ATCC 26029 / G186AR / H82 / RMSCC 2432)
Q3ZVI5	Putative transmembrane protein	Spiroplasma citri
B9S0N4	Putative uncharacterized protein	Ricinus communis
D8R8H9	Putative uncharacterized protein	Selaginella moellendorffii
E6RJH1	Hemolysin	Pseudoalteromonas sp. SM9913
B9RI90	Putative uncharacterized protein	Ricinus communis
C3FC62	Putative uncharacterized protein	Bacillus thuringiensis serovar monterrey BGSC 4AJ1
A7S9Z2	Predicted protein (Fragment)	Nematostella vectensis
A9LRT8	Aerolysin (Fragment)	Aeromonas hydrophila
Q207B3	Hemolysin	Aeromonas hydrophila
A3IDY9	Putative uncharacterized protein	Bacillus sp. B14905
Q45474	Mtx2	Bacillus sphaericus
D9YUU4	Aerolysin (Fragment)	Aeromonas hydrophila
C3HTD7	35.8-kilodalton mosquitocidal toxin	Bacillus thuringiensis serovar pulsiensis BGSC 4CC1
D2EPU2	LPXTG cell wall surface anchor family protein	Streptococcus sp. M143
Q74I55	Putative uncharacterized protein	Lactobacillus johnsonii
A3IDZ0	Putative uncharacterized protein	Bacillus sp. B14905
A4BUR1	Putative uncharacterized protein	Nitrococcus mobilis Nb-231
D0I1N5	Putative outer membrane adhesin like protein	Vibrio cholerae CT 5369-93
D0TMQ2	Putative uncharacterized protein	Bacteroides sp. 2_1_22
D7J0R3	Putative uncharacterized protein	Bacteroides sp. D22
A9LRU7	Aerolysin (Fragment)	Aeromonas hydrophila
C5L3V3	Putative uncharacterized protein	Perkinsus marinus ATCC 50983
B0QRA0	Putative uncharacterized protein	Bacillus anthracis str. A0442
D9VKZ2	Predicted protein	Streptomyces sp. C
D8SQA3	Putative uncharacterized protein	Selaginella moellendorffii
C3FAY4	Putative uncharacterized protein	Bacillus thuringiensis serovar monterrey BGSC 4AJ1
B5X1I2	Natterin-like protein	Salmo salar
Q01YA3	Putative uncharacterized protein	Solibacter usitatus (strain Ellin6076)
A8N812	Putative uncharacterized protein	Coprinopsis cinerea (strain Okayama-7 / 130 / FGSC 9003)
A7VAJ9	Putative uncharacterized protein	Bacteroides uniformis ATCC 8492
Q8RN83	Aerolysin (Fragment)	Aeromonas hydrophila
A6RIB4	Predicted protein	Botryotinia fuckeliana (strain B05.10)
Q8RN85	Aerolysin (Fragment)	Aeromonas hydrophila
A8NAB3	Putative uncharacterized protein	Coprinopsis cinerea (strain Okayama-7 / 130 / FGSC 9003)
C4QH93	Expressed protein	Schistosoma mansoni
B7P6U4	Salivary secreted cytotoxin, putative	Ixodes scapularis
B7PZP6	Crystal protein, putative	Ixodes scapularis
B2AEN2	Predicted CDS Pa_5_2020	Podospora anserina
D7U3H9	Whole genome shotgun sequence of line PN40024, scaffold_5.assembly12x (Fragment)	Vitis vinifera
Q8T5R1	Yolk protein 2	Hyphantria cunea
A8T2E9	Hemolysin	Vibrio sp. AND4
C3DDH6	Putative uncharacterized protein	Bacillus thuringiensis serovar thuringiensis str. T01001
O42345	Ep37-L2	Cynops pyrrhogaster
Q2MLU8	Hemolysin	Aeromonas hydrophila
D8R8I2	Putative uncharacterized protein	Selaginella moellendorffii
A7T570	Predicted protein (Fragment)	Nematostella vectensis
Q8GI66	Alpha-toxin	Clostridium septicum
B9N8Y6	Predicted protein	Populus trichocarpa
E1G1E1	LIN-24 Like family member (Fragment)	Loa loa
D0XHZ8	Putative uncharacterized protein	Vibrio harveyi 1DA3
A9VDS5	Predicted protein	Monosiga brevicollis
B9P8K8	Predicted protein (Fragment)	Populus trichocarpa
C4B693	Putative uncharacterized protein	Clostridium botulinum
D8PSZ1	Cytolysin	Schizophyllum commune (strain H4-8 / FGSC 9210)
D7K3R2	Putative uncharacterized protein	Bacteroides sp. 3_1_23
B2WSG4	Aerolysin (Fragment)	Aeromonas hydrophila
Q8VRH2	Aerolysin-like toxin (Fragment)	Aeromonas sobria
Q45475	Mtx2	Bacillus sphaericus
B1PNB7	Alpha-toxin	Clostridium septicum
A0KFE5	Hemolysin	Aeromonas hydrophila subsp. hydrophila (strain ATCC 7966 / NCIB 9240)
O96603	Follicular epithelium yolk protein subunit	Plodia interpunctella
D4WEP6	Putative lipoprotein	Bacteroides ovatus SD CMC 3f
A8WG79	Zgc:172244 protein	Danio rerio
A7T2A0	Predicted protein	Nematostella vectensis
Q787C9	Cytotoxin	Pseudomonas phage phiCTX
A6VF77	Putative uncharacterized protein	Methanococcus maripaludis (strain C7 / ATCC BAA-1331)
D8RP43	Putative uncharacterized protein	Selaginella moellendorffii
E7ECU8	Hemolysin (Fragment)	Aeromonas hydrophila
Q74L34	Putative uncharacterized protein	Lactobacillus johnsonii
B3DLL8	LOC100174801 protein	Xenopus laevis
D8Q513	Putative uncharacterized protein (Fragment)	Schizophyllum commune (strain H4-8 / FGSC 9210)
A2C7L1	Putative uncharacterized protein	Prochlorococcus marinus (strain MIT 9303)
Q4VA69	Putative uncharacterized protein mgc108497	Xenopus tropicalis
O42344	Ep37-A2	Cynops pyrrhogaster
A6AKR3	Pre-provibrioaerolysin	Vibrio harveyi HY01
Q46C28	Putative uncharacterized protein	Methanosarcina barkeri (strain Fusaro / DSM 804)
A3Y9W9	Putative uncharacterized protein	Marinomonas sp. MED121
B5BUV6	Parasporin2	Bacillus thuringiensis serovar shandongiensis
A7RF45	Predicted protein	Nematostella vectensis
Q4PKR8	Anarchy 1	Apis mellifera
A8WGA7	Zgc:172290 protein	Danio rerio
Q8GCZ4	Hemolysin	Aeromonas sobria
C3IVB5	Pesticidial crystal protein cry15Aa	Bacillus thuringiensis IBL 4222
Q93LQ0	Crystal protein ET75	Bacillus thuringiensis
B5I6Y6	Putative uncharacterized protein	Streptomyces sviceus ATCC 29083
D8QP61	Putative uncharacterized protein	Selaginella moellendorffii
Q3LRX0	Aerolysin	Aeromonas hydrophila
B0JJT5	Putative uncharacterized protein	Microcystis aeruginosa (strain NIES-843)
D8S316	Putative uncharacterized protein	Selaginella moellendorffii
A6RRQ3	Predicted protein	Botryotinia fuckeliana (strain B05.10)
B2BRT1	Ebetagamma-cat alpha subunit	Bombina maxima
B7QJ05	Secreted salivary gland peptide, putative (Fragment)	Ixodes scapularis
C3NZ91	Putative uncharacterized protein	Bacillus anthracis (strain A0248)
D4WXX8	Putative lipoprotein	Bacteroides ovatus SD CC 2a
Q8VRH5	Aerolysin-like toxin (Fragment)	Aeromonas hydrophila
Q44063	Cytolytic enterotoxin	Aeromonas hydrophila
Q8GI67	Alpha-toxin	Clostridium septicum
Q8RN77	Aerolysin (Fragment)	Aeromonas hydrophila
B4M9D3	GJ17938	Drosophila virilis
A9GCG4	Putative uncharacterized protein	Sorangium cellulosum (strain So ce56)
B7PZZ3	Putative uncharacterized protein	Ixodes scapularis
B3CH06	Putative uncharacterized protein	Bacteroides intestinalis DSM 17393
C1BWB2	Natterin-like protein	Esox lucius
D5SIM5	Putative uncharacterized protein	Streptomyces clavuligerus ATCC 27064
E1FUI3	LIN-24 Like family member	Loa loa
Q8GC91	Epsilon toxin (Fragment)	Clostridium perfringens D
Q208M1	Alpha-toxin	Clostridium septicum
D6D040	Putative uncharacterized protein	Bacteroides xylanisolvens XB1A
Q6B8G5	Putative salivary secreted peptide	Ixodes pacificus
C3HSF9	Putative uncharacterized protein	Bacillus thuringiensis serovar pulsiensis BGSC 4CC1
D8RBK3	Putative uncharacterized protein	Selaginella moellendorffii
Q8T5R2	Yolk protein 1	Hyphantria cunea
B0QB83	Putative uncharacterized protein	Bacillus anthracis str. A0193
D2XPP8	Aerolysin (Fragment)	Aeromonas hydrophila
Q63ZG4	LOC494812 protein	Xenopus laevis
B1PNA8	Alpha-toxin	Clostridium septicum
C3ICE4	Putative uncharacterized protein	Bacillus thuringiensis IBL 200
A7SW28	Predicted protein	Nematostella vectensis
D8TCR7	Putative uncharacterized protein	Selaginella moellendorffii
Q8PVU4	Putative uncharacterized protein	Methanosarcina mazei
Q8VRH7	Aerolysin-like toxin (Fragment)	Aeromonas hydrophila
C4G9F0	Putative uncharacterized protein	Shuttleworthia satelles DSM 14600
B2WSG3	Aerolysin (Fragment)	Aeromonas hydrophila
B1PNA9	Alpha-toxin	Clostridium septicum
C3HSG6	Putative uncharacterized protein	Bacillus thuringiensis serovar pulsiensis BGSC 4CC1
Q4PN44	Putative salivary secreted protein	Ixodes scapularis
D8QA98	Putative uncharacterized protein	Schizophyllum commune (strain H4-8 / FGSC 9210)
B7Q6U6	Putative uncharacterized protein	Ixodes scapularis
C7YXR9	Predicted protein	Nectria haematococca (strain 77-13-4 / FGSC 9596 / MPVI)
A7MCP2	Zgc:174689 protein	Danio rerio
E0IG74	Putative uncharacterized protein	Paenibacillus curdlanolyticus YK9
Q0ZST5	30 kDa salivary protein SP15	Phlebotomus argentipes
C3XRL4	Putative uncharacterized protein	Branchiostoma floridae
A3D2W6	Aerolysin/hemolysin/leukocidin toxin	Shewanella baltica (strain OS155 / ATCC BAA-1091)
Q7WZI1	Crystal protein	Bacillus thuringiensis subsp. dakota
B1F7H7	Putative uncharacterized protein	Bacillus anthracis str. A0389
Q45473	Mtx2	Bacillus sphaericus
A7E545	Predicted protein	Sclerotinia sclerotiorum (strain ATCC 18683 / 1980 / Ss-1)
B4LFU0	GJ13179	Drosophila virilis
O74163	C1 protein	Flammulina velutipes
B0DHY1	Predicted protein	Laccaria bicolor (strain S238N-H82)
B9NAC7	Predicted protein	Populus trichocarpa
Q7ZA63	Zb protein	Agrocybe chaxingu
C0EXN0	Putative uncharacterized protein	Eubacterium hallii DSM 3353
B1VN10	Putative uncharacterized protein	Streptomyces griseus subsp. griseus (strain JCM 4626 / NBRC 13350)
A8WG08	LOC795922 protein	Danio rerio
Q8A266	Putative uncharacterized protein	Bacteroides thetaiotaomicron
C3QVE4	Putative uncharacterized protein	Bacteroides sp. 2_2_4
B7PW66	Secreted salivary gland peptide, putative (Fragment)	Ixodes scapularis
B1HQ61	Hypothetical Mtx2/3 toxin-like protein	Lysinibacillus sphaericus (strain C3-41)
D8Q5Q6	Expressed protein	Schizophyllum commune (strain H4-8 / FGSC 9210)
A9V4H4	Predicted protein	Monosiga brevicollis
D8PXB5	Cytolysin (Fragment)	Schizophyllum commune (strain H4-8 / FGSC 9210)
E7D8R1	Epsilon-toxin (Fragment)	Clostridium perfringens D
Q5PXQ3	Cry14-4	Bacillus thuringiensis subsp. darmstadiensis
Q8GI68	Alpha-toxin	Clostridium septicum
B5GMM0	Putative uncharacterized protein	Streptomyces clavuligerus ATCC 27064
Q12LY8	Aerolysin/hemolysin/leukocidin toxin	Shewanella denitrificans (strain OS217 / ATCC BAA-1090 / DSM 15013)
D8QQF3	Putative uncharacterized protein	Selaginella moellendorffii
E6I1C3	Putative uncharacterized protein	Enterococcus faecalis TX0012
D8HAL3	Putative uncharacterized protein	Bacillus cereus var. anthracis (strain CI)
C6H367	Putative uncharacterized protein	Ajellomyces capsulata (strain H143)
Q24993	Follicle-specific yolk polypeptide-4	Galleria mellonella
D9YUU5	Hemolysin (Fragment)	Aeromonas hydrophila
D8SQA4	Putative uncharacterized protein	Selaginella moellendorffii
E0HLS0	Aerolysin/hemolysin/leukocidin toxin	Shewanella baltica OS183
D5A5I0	Putative uncharacterized protein	Arthrospira platensis NIES-39
A8QIT4	Aerolysin	Aeromonas veronii
A7MVX4	Putative uncharacterized protein	Vibrio harveyi (strain ATCC BAA-1116 / BB120)
D8TE00	Putative uncharacterized protein	Selaginella moellendorffii
Q9PVY5	Gep protein	Cynops pyrrhogaster
B1PNB1	Alpha-toxin	Clostridium septicum
E0AFT4	Hemolysin	Aeromonas hydrophila
Q52SK6	Hydralysin-3	Hydra viridissima
P09167	Aerolysin	Aeromonas hydrophila
O18423	Lysenin	Eisenia foetida
P14608	Cytotoxin	Pseudomonas aeruginosa
Q66S25	Natterin-1	Thalassophryne nattereri
P81007	Cytolytic protein enterolobin	Enterolobium contortisiliquum
Q9RMX3	Uncharacterized protein pXO2-60/BXB0074/GBAA_pXO2_0074	Bacillus anthracis
Q06306	Aerolysin-5	Aeromonas hydrophila
Q3LX99	Lysenin-related protein 3	Eisenia foetida
Q564A5	Hydralysin-2	Hydra viridissima
Q52SK7	Hydralysin	Hydra vulgaris
Q66S17	Natterin-3	Thalassophryne nattereri
Q08676	Aerolysin	Aeromonas salmonicida
Q02307	Epsilon-toxin type B	Clostridium perfringens
Q86LR2	Hydralysin-1	Hydra viridissima
Q06303	Aerolysin-4	Aeromonas hydrophila
Q06304	Aerolysin	Aeromonas sobria
Q5CZR5	Natterin-like protein	Danio rerio
P09166	Aerolysin	Aeromonas trota
Q66S13	Natterin-4	Thalassophryne nattereri
P46058	Epidermal differentiation-specific protein	Cynops pyrrhogaster
O18424	Lysenin-related protein 1	Eisenia foetida
O18425	Lysenin-related protein 2	Eisenia foetida
Q66S21	Natterin-2	Thalassophryne nattereri
Q45729	Pesticidal crystal protein cry15Aa	Bacillus thuringiensis subsp. thompsoni
Q06305	Aerolysin-3	Aeromonas hydrophila
